# Supplementary material for: Sex differences in patients with gastrointestinal stromal tumours: do they exist and does it affect survival?
Source: PubMed Central journal article supplement — ESMO Open. 2022 Dec 6;7(6):100649. doi: 10.1016/j.esmoop.2022.100649 (PMC9808455; doi:10.1016/j.esmoop.2022.100649), 2022-12-06
Supplement: mmc1.pdf [file mmc1.pdf]

PubMed Search 1:  
'GIST' and 'Sex Factors'  
n=55 articles

PubMed Search 2:  
'GIST' and 'male and female'/'gender' and  
'overall survival or disease specific survival'  
n=764 articles

819 articles

598 articles excluded based on abstract:

- <100 patients (367)
- no GIST (76)
- not available in English (76)
- background article (21)
- no sex in outcome model (19)
- duplicates (16)
- no outcome analysis (16)
- preclinical study (6)
- abstract only (1)

221 articles full read

103 articles excluded after full read:

- no sex in outcome model (75)
- <100 patients (13)
- no outcome analysis (12)
- background article (3)

118 articles included
