# Supplementary material for: Sex differences in patients with gastrointestinal stromal tumours: do they exist and does it affect survival?
Source: PubMed Central journal article supplement — ESMO Open. 2022 Dec 6;7(6):100649. doi: 10.1016/j.esmoop.2022.100649 (PMC9808455; doi:10.1016/j.esmoop.2022.100649), 2022-12-06
Supplement: mmc2.pdf [file mmc2.pdf]

## Supplementary Table 1: Overview of the literature on sex differences in GIST survival

This table gives an overview of all 117 articles that met the selection criteria and were included in the review of the literature. Articles are subdivided into articles focused on a specific GIST location (e.g. an article with gastric GIST patients only) or articles with all GIST locations but with patients at different disease stages (e.g. an article with patients with localised disease). All articles are only listed once.

| Year                                                | Refs                                      | No. of Pts. | Sex                         | Study Design                                    | Primary Outcome | FU          | Study population                                                                                                                                   | Sex differences                                                                                       | Gender prognostic factor? | Better outcome for M/F? |
|-----------------------------------------------------|-------------------------------------------|-------------|-----------------------------|-------------------------------------------------|-----------------|-------------|----------------------------------------------------------------------------------------------------------------------------------------------------|-------------------------------------------------------------------------------------------------------|---------------------------|-------------------------|
| <b>Articles focused on a specific GIST location</b> |                                           |             |                             |                                                 |                 |             |                                                                                                                                                    |                                                                                                       |                           |                         |
| <b>Oesophageal GIST</b>                             |                                           |             |                             |                                                 |                 |             |                                                                                                                                                    |                                                                                                       |                           |                         |
| 2020                                                | Schizas et al., 2020, JBUON               | 105         | M: 55, F: 50                | Meta-analysis. Oesophageal GIST                 | OS              | medFU 34m   | Oesophageal GISTs from case series and reports were included in this meta-analysis.                                                                | No sex difference for OS on univariate analysis.                                                      | No (U)                    | N/A                     |
| <b>Gastric GIST</b>                                 |                                           |             |                             |                                                 |                 |             |                                                                                                                                                    |                                                                                                       |                           |                         |
| 2000                                                | Nishida et al., 2000, J Exp Clin Canc Res | 125         | M: 68, F: 56, 1 unknown (?) | Retrospective monocentre cohort                 | DSS             | NS          | Primary gastric GIST patients that underwent surgery.                                                                                              | No sex difference for DSS                                                                             | No (M)                    | N/A                     |
| 2003                                                | Wong et al., 2003, Histopathology         | 108         | M: 58, F: 50                | Gastric GIST. Retrospective, monocentre cohort. | DSS             | medFU 43m   | Only gastric GIST after complete surgical resection                                                                                                | No difference on univariate survival analysis                                                         | No (U)                    | N/A                     |
| 2010                                                | Huang et al., 2010, World J Surg          | 187         | M: 97, F: 90                | Retrospective, monocentre cohort. Gastric GIST  | OS              | medFU 46.2m | Different gastric GIST sites.                                                                                                                      | No sex difference for OS on univariate analysis and therefore not included on multivariate analysis.  | No (U)                    | N/A                     |
| 2010                                                | Setoguchi et al., 2010, Cancer Science    | 104         | M: 56, F: 48                | Retrospective, multicentre cohort. Gastric GIST | DFS             | medFU 16m   | Gastric GIST patients.                                                                                                                             | No sex difference in 5-y postoperative DFS (univariate).                                              | No (U)                    | N/A                     |
| 2012                                                | Catena et al., 2012, Onkologie            | 151         | M: 90, F: 61                | Retrospective, multicentre cohort. Gastric GIST | DFS             | medFU 101m  | Patients with primary gastric GIST and surgical resection.                                                                                         | No sex difference for DFS on univariate analysis and therefore not included on multivariate analysis. | No (U)                    | N/A                     |
| 2014                                                | Lin et al., 2014, World J Of Surg Oncol   | 170         | M: 93, F: 77                | Retrospective, monocentre cohort. Gastric GIST  | OS              | medFU 38m   | Gastric GIST patients who underwent complete surgical resection were included. Gastric GIST only was compared to gastric GIST with gastric cancer. | No sex difference for OS on univariate analysis. More male in group with GIST and gastric cancer.     | No (U)                    | N/A                     |

Supplementary Table 1: Overview of the literature on sex differences in GIST survival

|      |                                              |      |                |                                                        |          |             |                                                                                                                                                             |                                                                                                                                                         |             |     |
|------|----------------------------------------------|------|----------------|--------------------------------------------------------|----------|-------------|-------------------------------------------------------------------------------------------------------------------------------------------------------------|---------------------------------------------------------------------------------------------------------------------------------------------------------|-------------|-----|
| 2014 | <b>Bischof et al., 2014, Ann Surg Oncol</b>  | 397  | M: 199, F: 198 | Retrospective, multicentre cohort. Gastric GIST        | RFS, OS  | medFU 33m   | Gastric GIST patients that underwent surgical resection. Outcome from patients with open surgery were compared to patients with minimally invasive surgery. | Male HR OR 2.46 (1.05-5.76, p=0.04) on multivariate analysis. No sex difference for RFS. Males less often minimally invasive surgery (41.3% vs. 58.7%). | Yes (M)     | F   |
| 2015 | <b>Kim et al., 2015, Medicine</b>            | 1057 | M: 531, F: 526 | Retrospective, multicentre cohort. Gastric GIST        | RFS      | medFU 95 m  | Patients with gastric GIST who underwent surgical resection.                                                                                                | Female HR RFS 0.48 (0.27-0.85, p=0.011) on multivariate analysis.                                                                                       | Yes (M) RFS | F   |
| 2015 | <b>Yamamoto et al., 2015, Ann Surg Oncol</b> | 482  | M: 258, F: 224 | Retrospective, multicentre cohort. Gastric GIST        | RFS      | medFU 58m   | Patients with gastric GIST. Symptomatic patients were compared to asymptomatic patients.                                                                    | In the symptomatic group a higher proportion females (57.7%, p=0.03). No significant sex difference for RFS on multivariate analysis.                   | No (M)      | N/A |
| 2016 | <b>Liu et al., 2016, Medicine</b>            | 241  | M: 126, F: 115 | Retrospective, monocentre study. Gastric GIST          | DFS, DSS | medFU 31.7m | Gastric GIST patients with synchronous gastric cancer were compared to gastric GIST patients only.                                                          | More male patients with synchronous gastric cancer. No sex difference for DFS (univariate) nor DSS (multivariate).                                      | No (M)      | N/A |
| 2017 | <b>Huang et al., 2017, Medicine</b>          | 214  | M: 110, F: 104 | Retrospective, monocentre cohort. Gastric GIST         | OS       | medFU 40m   | Gastric GIST patients who underwent surgical resection.                                                                                                     | No sex difference on univariable analysis and therefore not included in multivariable model.                                                            | No (U)      | N/A |
| 2017 | <b>Liu et al., 2017, Cancer Med</b>          | 740  | M:368, F:372   | Retrospective, multicentre cohort                      | DFS      | medFU 32.2m | Gastric GIST that underwent surgical resection. Tumours with tumour necrosis were compared with tumours without necrosis.                                   | No sex difference in frequency of tumour necrosis. No DSS sex difference on univariate analysis and therefore not included in multivariate analysis.    | No (U)      | N/A |
| 2018 | <b>Zheng et al., 2018, Fut Med</b>           | 246  | M:141, F:105   | Prospective follow-up study in 4 centres. Gastric GIST | OS       | mFU 34.5m   | 246 high-risk gastric GIST (>5cm and >5mitoses).                                                                                                            | No sex difference for OS in high-risk gastric GIST.                                                                                                     | No (U)      | N/A |
| 2019 | <b>Yang et al., 2019, J of GI Surg</b>       | 1846 | M: 918, F: 928 | Retrospective multicentre cohort. Gastric GIST         | DSS      | medFU 38m   | 1846 patients with primary gastric GIST.                                                                                                                    | No sex difference for DSS in high-risk gastric GIST on univariate and therefore not included on multivariate analysis.                                  | No (U)      | N/A |

Supplementary Table 1: Overview of the literature on sex differences in GIST survival

|                                      |                                     |      |                                         |                                                                   |          |            |                                                                                                                                                 |                                                                                                                                                                                       |         |     |
|--------------------------------------|-------------------------------------|------|-----------------------------------------|-------------------------------------------------------------------|----------|------------|-------------------------------------------------------------------------------------------------------------------------------------------------|---------------------------------------------------------------------------------------------------------------------------------------------------------------------------------------|---------|-----|
| 2020                                 | Liu et al., 2020, Med Sci Monit     | 4086 | M: 2032, F: 2054 (2862 in training set) | SEER database (1998-2015)                                         | OS, DSS  | medFU 47m  | Gastric GIST patients in SEER database with follow-up data.                                                                                     | Male OS HR 1.408 (1.221-1.624, p<0.001) and DSS HR male 1.286 (1.073-1.543, p=0.007) on multivariate analysis.                                                                        | Yes (M) | F   |
| 2021                                 | Shannon et al., 2021, J Surgery     | 2084 | M: 999, F:1085                          | Retrospective, National Cancer Database USA. Gastric GIST         | OS       | NS         | Primary resection gastric GIST without neoadjuvant imatinib. R0 resections were compared to R1 resections.                                      | Adjusted 5-y OS HR 1.59 male (1.22-2.07, p=0.001). No sex difference incidence R1 vs. R0.                                                                                             | Yes (M) | F   |
| <b>Duodenal and small bowel GIST</b> |                                     |      |                                         |                                                                   |          |            |                                                                                                                                                 |                                                                                                                                                                                       |         |     |
| 2017                                 | Zheng et al., 2017, Int J of Surg   | 153  | NS GIST                                 | Retrospective monocentre cohort. Small bowel GIST                 | PFS, OS  | medFU 22m  | 456 patients with small bowel cancer, from whom 153 with GIST.                                                                                  | No sex difference for OS nor PFS.                                                                                                                                                     | No (M)  | N/A |
| 2018                                 | Liu et al., 2018, BMC Cancer        | 300  | M: 143, F: 148                          | 37 monocentre cases, 263 cases from the literature. Duodenal GIST | DFS, DSS | medFU 25m  | Duodenal GIST patients with R0 resection and without neoadjuvant therapy (survival analysis n=202).                                             | No sex difference for DFS nor DSS on univariate analysis and therefore not included in multivariate analysis.                                                                         | No (U)  | N/A |
| 2018                                 | Giuliano et al., 2018, J Surg Oncol | 1890 | M: 9462, F: 9438                        | NCD 2004-2014                                                     | OS       | NS         | All small intestine GIST was compared to gastric GIST patients.                                                                                 | Relatively more males with small intestine GIST compared to gastric GIST. Female HR OS 0.62 (0.46-0.84, p=0.002) on multivariable analysis.                                           | Yes (M) | F   |
| 2019                                 | Feng et al., 2019, Dig Surg         | 702  | M: 399, F: 303 (DSS in n=584)           | SEER database 1973-2013                                           | DSS      | NS         | Patients with small intestinal GIST (jejunal and ileal). Multivariate analysis in 584 patients without distant metastases who received surgery. | Gender (unclear male/female gender) HR 0.544 (0.360-0.823, p=0.004, multivariate). In entire cohort relatively more male patients with jejunal GIST compared to ileal GIST (p=0.043). | Yes (M) | NS  |
| 2019                                 | Uppal et al., 2019, J Surg Oncol    | 1084 | M: 460, F: 414                          | NCDB 2004-2014. Duodenal GIST                                     | OS       | medFU 3.5y | Non-metastatic duodenal GIST patients. Survival analysis in 874 resected patients.                                                              | No sex difference for OS after resection of duodenal GIST (univariate nor multivariate).                                                                                              | No (M)  | N/A |

Supplementary Table 1: Overview of the literature on sex differences in GIST survival

|                                                                                       |                                          |      |                |                                                               |          |             |                                                                                                              |                                                                                                                                                                                                     |         |     |
|---------------------------------------------------------------------------------------|------------------------------------------|------|----------------|---------------------------------------------------------------|----------|-------------|--------------------------------------------------------------------------------------------------------------|-----------------------------------------------------------------------------------------------------------------------------------------------------------------------------------------------------|---------|-----|
| 2020                                                                                  | Patel et al., 2020, Surgery              | 1559 | M: 780, F: 779 | Retrospective, National Cancer Database USA. Small bowel GIST | OS       | medFU 38.6m | Small bowel GIST with R0 resection. Low grade (n=1140) and high grade GIST (n=268) were analysed separately. | Male patients more often adjuvant therapy (53.1% vs. 47.1%, p=0.018). In low grade GIST, female sex OS HR 0.53 on multivariate analysis (p-.003). No sex difference in high grade small bowel GIST. | Yes (M) | F   |
| <b>Anorectal GIST</b>                                                                 |                                          |      |                |                                                               |          |             |                                                                                                              |                                                                                                                                                                                                     |         |     |
| 2017                                                                                  | Hawkins et al., 2017, Ann Surg Oncol     | 333  | M: 188, F: 145 | SEER database 1998-2012. Anorectal GIST                       | OS       | NS          | Anorectal GIST patients who underwent surgical resection.                                                    | No sex difference for OS on univariable analysis and therefore not included in multivariable analysis.                                                                                              | No (U)  | N/A |
| 2020                                                                                  | IJzerman et al., 2020, EJSO              | 210  | M: 132, F: 78  | Retrospective, multicentre cohort. Rectal GIST                | RFS      | medFU 28m   | Rectal GIST patients from 5 European countries. 109 patients in survival analysis.                           | No sex difference for RFS on univariate analysis.                                                                                                                                                   | No (U)  | N/A |
| <b>Articles including all GIST locations and patients at different disease stages</b> |                                          |      |                |                                                               |          |             |                                                                                                              |                                                                                                                                                                                                     |         |     |
| <b>Patients with surgical resection of primary GIST</b>                               |                                          |      |                |                                                               |          |             |                                                                                                              |                                                                                                                                                                                                     |         |     |
| 2007                                                                                  | Takahashi et al., 2007, Int J Clin Oncol | 303  | M:154, F: 139  | Retrospective monocentre cohort. 1987-2003                    | DSS      | medFU 65.5m | Patients after surgical resection of primary GIST.                                                           | No sex difference in 5-year survival rate on univariate analysis.                                                                                                                                   | No (U)  | N/A |
| 2007                                                                                  | Hsu et al., 2007, Am J of Surg           | 100  | M: 48, F: 52   | Retrospective cohort, 2 centres                               | RFS, OS  | medFU 49m   | Patients with small bowel or gastric GIST undergoing surgical resection.                                     | No sex difference for RFS nor OS on multivariate analyses.                                                                                                                                          | No (M)  | N/A |
| 2007                                                                                  | Huang et al., 2007, Surgery              | 289  | M: 140, F: 149 | Retrospective cohort, 2 centres                               | DSS      | medFU 41m   | Primary resected GIST.                                                                                       | No difference on univariate survival analysis                                                                                                                                                       | No (U)  | N/A |
| 2008                                                                                  | Hassan et al., 2008, Ann of Surg Onc     | 191  | M: 108, F: 83  | Retrospective, monocentre cohort                              | DFS, DSS | medFU 63m   | Surgically resected GIST patients.                                                                           | No significant sex difference for DFS nor OS on multivariate analyses (NB male HR OS 1.7 (95%CI 1.0-2.8) p=0.05                                                                                     | No (M)  | N/A |
| 2009                                                                                  | Song et al., 2009, Hep-Gastroent         | 235  | M : 81, F: 54  | Retrospective, monocentre cohort                              | OS       | medFU 36.8m | Surgically resected GIST patients.                                                                           | No sex difference for OS on univariate analysis and therefore not included on multivariate analysis.                                                                                                | No (U)  | N/A |

Supplementary Table 1: Overview of the literature on sex differences in GIST survival

|      |                                                    |      |                |                                                         |         |             |                                                                                                                     |                                                                                                                                               |                       |     |
|------|----------------------------------------------------|------|----------------|---------------------------------------------------------|---------|-------------|---------------------------------------------------------------------------------------------------------------------|-----------------------------------------------------------------------------------------------------------------------------------------------|-----------------------|-----|
| 2010 | Rutkowski et al., 2010, Cancer                     | 640  | M: 295, F: 345 | Retrospective multicentre cohort (Polish GIST registry) | DFS     | medFU 39m   | Primary GIST with resection.                                                                                        | Male gender negative impact on DFS on univariate analysis (HR NS)                                                                             | Yes (U)               | F   |
| 2010 | Martin-Broto et al., 2010, Ann of Onc              | 162  | M: 82, F: 80   | Retrospective cohort                                    | RFS     | medFU 84m   | Patients after surgical resection of primary GIST.                                                                  | No sex difference for RFS on univariate analysis.                                                                                             | No (U)                | N/A |
| 2010 | Arne et al., 2010, J of Int Canc, (Suppl. Table 4) | 204  | M: 106, F: 98  | Retrospective, population based study in Sweden         | OS      | NS          | All pre-imatinib era treated patients with surgical resection (all R0).                                             | OS HR Male 5.44 (1.62-18.2, p=0.006, multivariate)                                                                                            | Yes (M)               | F   |
| 2012 | Pedroso et al., 2012, Ann Surg Oncol               | 594  | M: 298, F: 296 | SEER database, gastric GIST                             | OS, DSS | NS          | Surgically resected gastric GIST. Pre-TKI cohort (1990-1994, n=189) compared to post-TKI cohort (2002-2003, n=405). | Female HR 6-y OS 0.596 (95%CI 0.413-0.861, p=0.006) in post-TKI era. No OS sex difference in pre-TKI era, besides, no sex differences in DSS. | Yes (M, post-TKI era) | F   |
| 2013 | Lv et al., 2013, PLOS one                          | 114  | M: 67, F: 47   | Retrospective, monocentre cohort                        | RFS     | medFU 50m   | Patients with R0 resection of primary GIST. 65% gastric GIST.                                                       | 5-year RFS rate male 55.7% vs. 80.6% for female patients. For unclear reasons, not included in multivariate analysis.                         | Yes (U)               | F   |
| 2013 | DeMatteo et al., 2013, Ann Surg                    | 106  | M: 60, F: 46   | Retrospective analysis on ACOSOG Z9000 study            | RFS, OS | medFU 7.7y  | Patients with high-risk, primary GIST and adjuvant imatinib.                                                        | No sex difference for mutation status. No sex difference for RFS on multivariate analysis nor for OS on univariate analysis.                  | No (M)                | N/A |
| 2013 | Kang et al., 2013, Asia-Pac J of CO                | 213  | M: 89, F: 124  | Retrospective, multicentre study                        | RFS, OS | medFU 18.4m | GIST patients who underwent surgery. Influence of VEGF was established.                                             | No sex difference for RFS nor OS on univariate analysis.                                                                                      | No (U)                | N/A |
| 2014 | Lv et al., 2014 Gastroent Res and Prac             | 1923 | M: 864, F: 878 | Retrospective, multicentre study                        | OS      | NS          | All GIST patients diagnosed in Shanghai from 2001 to 2010.                                                          | 5-year OS 83% for male vs. 87% for female patients. Male gender HR 1.47 on multivariate analysis (p=0.004).                                   | Yes (M)               | F   |
| 2014 | Cananzi et al., 2014, Lang Arch Surg               | 104  | M: 47, F: 57   | Retrospective, monocentre cohort                        | DFS     | medFU 41m   | All patients had their primary GIST resected by the same surgeon.                                                   | No sex difference for DFS.                                                                                                                    | No (M)                | N/A |
| 2014 | Wang et al., 2014, BMC Surgery                     | 401  | M: 221, F: 180 | Retrospective, monocentre cohort                        | RFS, OS | NS          | Patients with operable GIST.                                                                                        | Better 5-y OS and 5-y RFS for female patients on univariate analysis. Not included in multivariate model.                                     | Yes (U)               | F   |

Supplementary Table 1: Overview of the literature on sex differences in GIST survival

|      |                                         |     |                |                                                              |          |             |                                                                                                                     |                                                                                                                                                                                                                             |         |     |
|------|-----------------------------------------|-----|----------------|--------------------------------------------------------------|----------|-------------|---------------------------------------------------------------------------------------------------------------------|-----------------------------------------------------------------------------------------------------------------------------------------------------------------------------------------------------------------------------|---------|-----|
| 2015 | Han et al., 2015, World J Surg          | 101 | M: 54, F: 47   | Retrospective, monocentre cohort                             | OS       | medFU 62m   | Primary localized duodenal or small intestine GIST patients who underwent surgical resection.                       | No sex difference on univariate analysis.                                                                                                                                                                                   | No (U)  | N/A |
| 2015 | Liu et al., 2015, Cell Biochem Biophys  | 168 | M: 113, F: 55  | Retrospective, monocentre cohort                             | OS       | NS          | Patients what underwent surgical resection                                                                          | No sex difference on univariate OS analysis                                                                                                                                                                                 | No (U)  | N/A |
| 2015 | Yanagimoto et al., 2015, Gastric Cancer | 712 | M: 382, F: 330 | Retrospective, monocentre cohort                             | RFS      | medFU 50.2m | Primary GIST with complete resection from 1980-2010.                                                                | No significant sex difference for RFS (male HR 1.406, p=0.12).                                                                                                                                                              | No (M)  | N/A |
| 2015 | Li et al., 2015, Int C Lin Exp Pathol   | 112 | M: 64, F: 48   | Retrospective, monocentre cohort                             | OS       | NS          | Patients who underwent surgical resection.                                                                          | No sex difference for OS on univariate analysis.                                                                                                                                                                            | No (U)  | N/A |
| 2016 | Stotz et al., 2016, Plos One            | 149 | M: 85, F: 64   | Retrospective, monocentre cohort                             | RFS, OS  | medFU 4.8y  | Primary GIST after surgical resection.                                                                              | No sex difference for RFS nor OS on univariate analysis.                                                                                                                                                                    | No (U)  | N/A |
| 2016 | Feng et al., 2016, Medicine             | 274 | M: 138, F: 136 | Retrospective, monocentre study                              | DFS      | medFU 30m   | Primary GIST patients after complete resection. Influence of different lymphocyte ratio's on RFS were investigated. | No sex difference for RFS on univariate analysis and gender was not included in multivariable analysis. Male did have more often high preoperative monocyte to lymphocyte rate and high monocyte-to-white blood cell ratio. | No (U)  | N/A |
| 2017 | D'Ambrosio et al., 2017, EJC            | 233 | M: 113, F: 102 | Retrospective analysis from prospectively collected database | RFS, DSS | medFU 68m   | Primary resectable GIST >2 cm with available data.                                                                  | No sex difference for RFS nor DSS and therefore not included on multivariate analysis.                                                                                                                                      | No (U)  | N/A |
| 2017 | Lin et al., 2017, J Canc Res Clin Oncol | 234 | M: 140, F: 94  | Retrospective monocentre cohort                              | OS       | medFU 54m   | High-risk GIST patients who received IM after surgical resection.                                                   | No sex difference for OS on univariate analysis and therefore not included in multivariate analysis.                                                                                                                        | No (M)  | N/A |
| 2018 | Nishida et al., 2018, Ann Surg Oncol    | 665 | M: 339, F: 326 | Retrospective, multicentre cohort                            | RFS, OS  | medFU 4.67y | Primary GIST who underwent R0 or R1 surgery. Ruptured tumours were compared to non-ruptured tumours.                | Male OS HR 2.347 (1.738-3.168, p=0,0045) on multivariate analysis. No sex difference for RFS.                                                                                                                               | Yes (M) | F   |

Supplementary Table 1: Overview of the literature on sex differences in GIST survival

|      |                                                   |      |                  |                                                    |         |             |                                                                                                                                                         |                                                                                                                              |         |     |
|------|---------------------------------------------------|------|------------------|----------------------------------------------------|---------|-------------|---------------------------------------------------------------------------------------------------------------------------------------------------------|------------------------------------------------------------------------------------------------------------------------------|---------|-----|
| 2018 | Lu et al., 2018, <i>Medicine</i>                  | 691  | M: 410, F: 281   | Retrospective, monocentre cohort                   | RFS, OS | medFU 64m   | Primary GIST patients who underwent surgical resection. Ruptured GISTs were compared to non-ruptured GIST.                                              | No sex difference for RFS nor DSS on univariate analysis and therefore not included in multivariate analysis.                | No (U)  | N/A |
| 2018 | Liu et al., 2018, <i>Human Path</i>               | 1022 | M: 540, F: 482   | Retrospective, multicentre cohort (2004-2015)      | OS      | medFU 24m   | Patients who underwent surgical resection.                                                                                                              | No sex difference for OS on univariate analysis and therefore not included on multivariate analysis.                         | No (U)  | N/A |
| 2018 | Liu et al., 2018, <i>J of GI surg</i>             | 506  | M: 285, F: 221   | Retrospective, multicentre cohort (2001-2015)      | OS      | medFU 31.4m | High-risk GIST patients undergoing complete surgical resection.                                                                                         | No sex difference for OS on univariate analysis and therefore not included on multivariate analysis.                         | No (U)  | N/A |
| 2018 | Hatipoglu et al., 2018, <i>Rev Esp Enferm Dig</i> | 135  | M: 76, F: 59     | Retrospective monocentre cohort                    | OS      | NS          | GIST patients in one centre that underwent surgical resection.                                                                                          | No sex difference on univariable analysis.                                                                                   | No (U)  | N/A |
| 2018 | Lei et al., 2018, <i>JBUON</i>                    | 108  | M: 51, F: 57     | Retrospective, monocentre cohort                   | PFS, OS | medFU 48m   | Patients who underwent tumour resection for high-risk GIST. Patients with adjuvant imatinib were compared to patients without adjuvant imatinib.        | No sex difference for PFS nor OS on univariate analysis and therefore not included on multivariate analysis.                 | No (U)  | N/A |
| 2018 | Cananzi et al., 2018, <i>J Surg Onc</i>           | 127  | M: 75, F: 65     | Retrospective, monocentre cohort (2000-2014 Milan) | DFS     | NS          | GIST patients who underwent surgery.                                                                                                                    | No sex difference for DFS.                                                                                                   | No (U)  | N/A |
| 2019 | Chen et al., 2019, <i>Int J Health Plann Mgmt</i> | 6583 | M: 3359, F: 3223 | SEER database (1973-2013)                          | DSS, OS | NS          | GIST patients with surgical resection and known marital status.                                                                                         | Male more often married (72.5% vs. 51.6%). Female HR DSS 0.707 (0.611-0.819, p<0.001) on multivariate analyses (also for OS) | Yes (M) | F   |
| 2019 | Inaba et al., 2019, <i>Surg Endos</i>             | 5096 | M:2496, F: 2610  | NCD database 2010-2014                             | OS      | NS          | Patients with small intestine or gastric GIST who underwent surgical resection. Outcomes after laparoscopic resection were compared to open resections. | Female HR OS 0.59 (0.48-0.73, p<0.01)                                                                                        | Yes (M) | F   |
| 2019 | Wan et al., 2019, <i>Canc Med</i>                 | 800  | M: 364, F: 436   | Retrospective, monocentre cohort                   | RFS, OS | medFU 43m   | Primary GIST with GI bleeding were compared to GIST patients without bleeding.                                                                          | No sex difference for RFS nor OS on univariate analysis and therefore not included on multivariate analysis.                 | No (U)  | N/A |

Supplementary Table 1: Overview of the literature on sex differences in GIST survival

|                                                                              |                                          |      |                 |                                                           |            |             |                                                                                                                                                       |                                                                                                                                                                                    |                      |     |
|------------------------------------------------------------------------------|------------------------------------------|------|-----------------|-----------------------------------------------------------|------------|-------------|-------------------------------------------------------------------------------------------------------------------------------------------------------|------------------------------------------------------------------------------------------------------------------------------------------------------------------------------------|----------------------|-----|
| 2019                                                                         | Chen et al., 2019, EJSO                  | 183  | M: 94, F: 89    | Retrospective, monocentre cohort                          | RFS        | mFU 57m     | Experimental group from one Chinese centre, including patients with primary surgical resection without perioperative TKI.                             | No sex difference for RFS on univariate analysis and therefore not included in multivariate analysis.                                                                              | No (U)               | N/A |
| 2019                                                                         | Shen et al., 2019, Canc Med              | 1163 | M: 629, F: 534  | Retrospective, monocentre cohort                          | DFS, OS    | medFU 43m   | Survival analysis was performed for 348 cases were qualified as high-risk GIST (modified NIH) after R0 resection with follow-up data.                 | Female HR DFS 0.591 (0.404-0.865, p=0.007) on multivariate analysis. No sex difference for OS nor in patients with low-risk GIST.                                                  | Yes, DFS (M)         | F   |
| 2020                                                                         | Chang et al., 2020, BMC Gastroenterology | 646  | M: 347, F: 299  | Retrospective, monocentre cohort                          | RFS, OS    | medFU 49m   | All GIST patients surgically treated. Preoperative neutrophil-to-lymphocyte ratio (NLR) and platelet-to-lymphocyte ratio (PLR) were compared.         | Male patients more often high NLR. No significant difference for PLR. No sex difference for RFS nor OS on univariate analyses and therefore not included on multivariate analysis. | No (U)               | N/A |
| 2021                                                                         | Patel et al., 2021, Am. J of Surg        | 2064 | M: 847, F: 1217 | Retrospective, National Cancer Database USA               | OS         | medFU 38.4m | GIST $\leq$ 3 cm undergoing resection.                                                                                                                | 5-yOS HR female 0.44 (0.30,-0.66, p<0.001, multivariate)                                                                                                                           | Yes (M)              | F   |
| 2021                                                                         | Tyler et al., 2021, J Surgic Oncol       | 195  | M: 116, F: 79   | Retrospective study, two sarcoma centres                  | RFS and OS | MedFU 70m   | Patients undergoing surgery for primary GIST without neoadjuvant therapy. Tumours with necrosis were compared with tumours without necrosis.          | No sex difference for incidence of tumour necrosis. No sex difference for OS. Male HR 2.99 (1.33-6.73, p=0.008) for RFS. Both multivariate.                                        | Yes (RFS, no OS) (M) | F   |
| 2021                                                                         | Wu et al., 2021, World J of GE           | 983  | M: 506, F: 477  | Retrospective, monocentre cohort                          | RFS, OS    | medFU 1468d | GIST patients undergoing resection.                                                                                                                   | No sex difference for RFS nor OS on univariate analysis and therefore not included in multivariate analysis.                                                                       | No (U)               | N/A |
| <b>Advanced GIST patients (i.e. inoperable/metastatic/recurrent disease)</b> |                                          |      |                 |                                                           |            |             |                                                                                                                                                       |                                                                                                                                                                                    |                      |     |
| 2007                                                                         | Gold et al., 2007, Ann of Surgic Onco    | 119  | M: 70, F: 29    | Retrospective, monocentre cohort. (M1 at MSKCC 1981-1998) | OS         | NS          | Metastatic GIST patients diagnosed before July 1998                                                                                                   | Female 25m vs. male 17 months on univariate analysis (p<0.01), no difference on multivariate analysis                                                                              | No (M)               | N/A |
| 2008                                                                         | Blanke et al., 2008, JCO (phase 3)       | 694  | M: 376, F: 318  | Prospective, clinical trial                               | OS         | medFU 4.5y  | Metastatic or surgically unresectable GIST were eligible for this phase III open-label clinical trial comparing imatinib 400 mg with imatinib 800 mg. | Male HR OS 1.308 (95CI: 1.030-1.663, p=0.0279, multivariate)                                                                                                                       | Yes (M)              | F   |



Supplementary Table 1: Overview of the literature on sex differences in GIST survival

|      |                                          |      |                |                                                 |              |             |                                                                                                                                            |                                                                                                                                 |             |     |
|------|------------------------------------------|------|----------------|-------------------------------------------------|--------------|-------------|--------------------------------------------------------------------------------------------------------------------------------------------|---------------------------------------------------------------------------------------------------------------------------------|-------------|-----|
| 2008 | Blanke et al., 2008, JCO (phase 2)       | 147  | M: 83, F: 64   | Prospective, clinical trial                     | OS           | medFU 63m   | Advanced GIST patients treated with 400 mg or 600 mg imatinib.                                                                             | Female OS HR 0.487 (p=0.0093) on multivariate analysis (n=124).                                                                 | Yes (M)     | F   |
| 2010 | MetaGIST, 2010, JCO                      | 1640 | NS             | Retrospective analysis on data from three RCTs. | PFS, OS      | medFU 45m   | Advanced GIST patients randomized to imatinib 400 mg vs. 800 mg in three trials combined.                                                  | Male poor prognostic factor for PFS and OS. Female sex PFS HR 0.83 (p=0.0021) and OR HR 0.78 (p=0.0026).                        | Yes (M)     | F   |
| 2012 | George et al., 2012, Ann of Onc          | 340  | M: 217, F: 123 | Retrospective, multicentre cohort               | TTP, PFS, OS | NS          | Advanced GIST patients treated with sunitinib in three GIST studies.                                                                       | Male HR TTP 1.32, male PFS HR 1.33, male HR OR 1.45, all on multivariate analyses.                                              | Yes (M)     | F   |
| 2012 | Kang et al., 2012, Acta Oncol            | 290  | M: 163, F: 127 | Retrospective, multicentre cohort               | PFS, OS      | medFU 42.8m | Locally advanced unresectable, metastatic or recurrent GIST.                                                                               | No sex difference for PFS nor OS on univariate analysis and therefore not included on multivariate analysis (appendix Table 3). | No (U)      | N/A |
| 2012 | Italiano et al., 2012, Ann Surg Oncol    | 223  | M: 131,        | Retrospective, multicentre cohort               | RFS, OF      | medFU 27m   | Imatinib- and sunitinib resistant metastatic GIST patients.                                                                                | No sex difference on univariate RFS nor OS analyses and therefore not included on multivariate analysis.                        | No (U)      | N/A |
| 2013 | Rutkowski et al., 2013, Med Oncol        | 430  | M: 226, F:204  | Retrospective, Polish GIST Registry (2001-2010) | PFS, OS      | medFU 51m   | Inoperable/metastatic/recurrent GIST patients treated with imatinib in reference centres                                                   | No sex difference for RFS nor OS on univariate analysis and therefore not included in multivariate analysis.                    | No (U)      | N/A |
| 2013 | An et al., 2013, Ann of Surg Onc         | 249  | M: 147, F: 102 | Retrospective, monocentre cohort                | PFS, OS      | medFU 44m   | Patients with advanced GIST: surgical cytoreduction (n=35) vs. non-surgical cytoreduction (n=214) prior to imatinib treatment.             | No sex difference for PFS nor OS (univariate nor multivariate). No difference in sex distribution among the group.              | No (M)      | N/A |
| 2013 | Osuch et al., 2013, Polski Przeg Chirurg | 279  | M: 145, F: 134 | Retrospective, multicentre cohort               | PFS, OS      | mFU 48m     | Patients with advanced GIST treated with imatinib.                                                                                         | No significant sex difference in PFS nor OS, data not shown.                                                                    | No (M)      | N/A |
| 2014 | Park et al., 2014, Ann of Surg Onc       | 134  | M: 80, F:54    | Retrospective, monocentre cohort                | PFS, OS      | medFU 58.9m | Recurrent or metastatic GIST patients. Outcome of patients with resection of residual disease and imatinib were compared to imatinib only. | Male HR PFS 2.20 (95% CI 1.17-4.14, p=0.015) on multivariate analysis. No sex difference for OS on multivariate analysis.       | Yes PFS (M) | F   |
| 2014 | Bauer et al., 2014, EJSO                 | 239  | M: 122, F: 177 | Retrospective, multicentre cohort               | OS           | medFU 5.1y  | Patients that underwent surgical resection of residual metastatic disease.                                                                 | Male HR OS 1.90 (1.00-3.59, p=0,038)                                                                                            | Yes (M)     | F   |

Supplementary Table 1: Overview of the literature on sex differences in GIST survival

|      |                                               |      |                |                                   |         |             |                                                                                                                                                                                                              |                                                                                                                                                                                  |         |     |
|------|-----------------------------------------------|------|----------------|-----------------------------------|---------|-------------|--------------------------------------------------------------------------------------------------------------------------------------------------------------------------------------------------------------|----------------------------------------------------------------------------------------------------------------------------------------------------------------------------------|---------|-----|
| 2015 | Rubio-Casadevall et al., 2015, Ann Surg Oncol | 171  | M: 102, F: 69  | Retrospective, multicentre cohort | PFS, OS | medFU 56.6m | Unresectable, locally advanced or metastatic GIST treated with imatinib for at least 6 months without progressive disease. Patients from Spanish GIST Registry whose treatment was initiated from 2001-2008. | No sex difference for PFS on multivariate analysis nor for OS on univariate analysis (and therefore not included in multivariate analysis).                                      | No (M)  | N/A |
| 2016 | Patrikidou et al., 2016, EJC                  | 228  | M: 144, F: 84  | BFR14 trial                       | PFS, OS | medFU 73m   | Advanced GIST patients treated with imatinib 400 mg.                                                                                                                                                         | Female HR OS 0.485 (95%CI 0.294-0.798, p=0.044) and female HR PFS 0.513 (0.351-0.759, p=0.006) on multivariate analyses. mPFS for females was 49months compared to 24 for males. | Yes (M) | F   |
| 2017 | Casali et al., 2017, JCO                      | 946  | M: 573, F: 373 | Prospective, clinical trial       | PFS, OS | medFU 10.9y | Metastatic GIST patients treated with imatinib 400 mg of 800 mg daily.                                                                                                                                       | HR female 0.83 (0.70-0.97, p=0.02) for OS on multivariate analysis. No sex difference in PFS.                                                                                    | Yes (M) | F   |
| 2017 | Heinrich et al., 2017, JAMA Oncol             | 695  | NS             | S0033 trial                       | OS      | medFU 9.4y  | Patients with advanced GIST that received imatinib 400 of 800 mg daily in trial setting. Current report on long-term outcome.                                                                                | Male HR OS 1.79 (1.36-2.35, p<0.0001) on multivariable analysis.                                                                                                                 | Yes (M) | F   |
| 2017 | Shi et al., 2017, Medicine                    | 144  | M: 90, F: 54   | Retrospective, multicentre cohort | OS      | medFU 48.2m | GIST patients with liver metastases.                                                                                                                                                                         | No sex difference for OS on multivariate analysis.                                                                                                                               | No (M)  | N/A |
| 2018 | Rutkowski et al., 2018, Tumori Journal        | 385  | M: 194, F: 191 | Retrospective, multicentre cohort | PFS, OS | medFU 55m   | Patients with metastatic/unresectable GIST treated initially with imatinib.                                                                                                                                  | No sex difference for 5-y RFS nor 5-y OS on univariate analysis.                                                                                                                 | No (U)  | N/A |
| 2018 | Gatainidis et al., 2018, J of GI Canc         | 514  | M: 280, F: 234 | SEER 2004-2013                    | DSS     | medFU 25.5m | Patients with GIST and distant metastases at diagnosis. Outcome of patients with surgery was compared to outcome without surgery.                                                                            | No sex difference for DSS nor OS on univariate analysis and therefore not included in multivariate model.                                                                        | No (U)  | N/A |
| 2019 | Kim et al., 2019, Cancer Medicine             | 379  | M: 229, F: 150 | Retrospective, monocentre cohort  | PFS, OS | medFU 6.1y  | Patients with metastatic or recurrent GIST treated with 400 mg imatinib.                                                                                                                                     | No sex difference for PFS nor OS on univariable analysis and therefore not included in multivariable analysis.                                                                   | No (U)  | N/A |
| 2019 | Brzozowska et al., 2019, Med Sc Mon           | 1640 | M: 914, F: 726 | Retrospective, multicentre cohort | OS      | medFU 71m   | Advanced GIST patients treated with imatinib, sunitinib or sorafenib.                                                                                                                                        | Female HR OS 0.811 (p<0.001) on multivariate analysis (age and sex only).                                                                                                        | Yes (M) | F   |

Supplementary Table 1: Overview of the literature on sex differences in GIST survival

|                                                    |                                         |      |                  |                                                           |                   |                 |                                                                                                                                                                                                                                               |                                                                                                                                                      |         |     |
|----------------------------------------------------|-----------------------------------------|------|------------------|-----------------------------------------------------------|-------------------|-----------------|-----------------------------------------------------------------------------------------------------------------------------------------------------------------------------------------------------------------------------------------------|------------------------------------------------------------------------------------------------------------------------------------------------------|---------|-----|
| 2019                                               | Yang et al., 2019, Clin and Transl Onc  | 4224 | M: 2188, F: 2036 | SEER database liver, lung and bone metastases (2010-2015) | OS                | NS              | From a total of 4224 patients, 440 with metastases: 388 liver, 20 bone, 32 lung.                                                                                                                                                              | In group with liver metastases (n=388), worse OS for male patients (HR 1.65 (1.15-2.36, p=0.006) on multivariate analysis.                           | Yes (M) | F   |
| 2019                                               | Hung et al., 2019, Cancer Control       | 188  | M: 122, F: 66    | Retrospective, monocentre cohort                          | PFS, OS           | medFU 40.8m     | Patients with unresectable or recurrent GIST treated with imatinib.                                                                                                                                                                           | No sex difference for PFS nor OS on multivariate analysis.                                                                                           | No (M)  | N/A |
| GIST patients at different disease stages combined |                                         |      |                  |                                                           |                   |                 |                                                                                                                                                                                                                                               |                                                                                                                                                      |         |     |
| 2000                                               | Denatteeo et al., 2000, Ann Surg        | 200  | M: 112, F: 88    | Retrospective, monocentre cohort. MSKCC 1982-1998         | DSS               | medFU 14 months | 46% had primary disease without metastasis, 47% had metastasis, and 7% had isolated local recurrence. In patients with primary disease who underwent complete resection of gross disease (n = 80), the 5-year actuarial survival rate was 54% | Entire cohort: Male RR 1.6 (1.0-2.6) on multivariate analysis. Complete resection group: no significant sex difference, no RR given                  | Yes (M) | F   |
| 2001                                               | Clary et al., 2001, Ann of Surg Onc     | 239  | M:138, F:101     | Retrospective, monocentre cohort. MSKCC (1982-1999)       | DSS               | medFU 24 months | 239 GIST and 322 LMS patients were compared. 112 GIST patients had local disease (primary GIST tumour only) at presentation.                                                                                                                  | GIST-all: male HR 1.38 (multivariate, P<0.01). GIST-primary: male HR 1.47 (p=0.04, multivariate)                                                     | Yes (M) | F   |
| 2005                                               | Tran et al., 2005, Am J of Gastroent    | 1458 | M: 788, F: 670   | Retrospective, national cohort. (SEER 1992-2000)          | Risk of mortality | NS              | Patients with localized disease and advanced disease.                                                                                                                                                                                         | Difference in 5-yr mortality risk: female HR 0.83 (0.71-0.97, p=0.02). No difference in 1-yr mortality risk: HR female 0.89. Most likely univariate. | Yes (U) | F   |
| 2007                                               | Perez et al., 2007, J Gastrointest Surg | 1535 | NS               | Retrospective, multicentre cohort. (SEER 1991-2002)       | OS                | 35m             | 1873 in total: 82% GIST and 18% smooth muscle neoplasm. The aim was to determine outcome after different surgical approaches.                                                                                                                 | Gender OS HR 1.46 (1.20-1.79, p=0.001, multivariate), reference not specified.                                                                       | Yes (M) | NS  |
| 2008                                               | Gouveia et al. 2008, World J Surg       | 104  | M:46, F: 58      | Retrospective, monocentre cohort                          | RFS, DSS          | medFU 42.6m     | All primary GIST patients between 1989 and 2006.                                                                                                                                                                                              | No sex difference for RFS nor DSS on univariate analyses.                                                                                            | No (U)  | N/A |
| 2008                                               | Artinyan et al., 2008, Cancer           | 552  | M: 240, F:312    | Retrospective, national cohort (SEER 1995-2004)           | OS                | NS              | Metastatic GIST patients diagnosed in 1995-2000 (n=140) compared to diagnosed in 2001-2004 (n=412)                                                                                                                                            | Female HR OS 1.05 (0.76-1.45, p=0.77, multivariate)                                                                                                  | No (M)  | N/A |

Supplementary Table 1: Overview of the literature on sex differences in GIST survival

| Epidemiol<br>biomarkers |                                                    |      |                                |                                                 |            |            |                                                                                                                  |                                                                                                                               |                |     |
|-------------------------|----------------------------------------------------|------|--------------------------------|-------------------------------------------------|------------|------------|------------------------------------------------------------------------------------------------------------------|-------------------------------------------------------------------------------------------------------------------------------|----------------|-----|
| 2009                    | Hou et al., 2009, Modern Path                      | 297  | M: 373, F:240 (NS in subgroup) | Retrospective multicentre cohort.               | DFS        | NS         | All GIST patients with follow-up data.                                                                           | No sex difference for DFS on multivariate analysis.                                                                           | No (M)         | N/A |
| 2009                    | Woodall et al., 2009, Arch Surg                    | 2537 | M: 1329, F: 1207               | Retrospective, national cohort (SEER 1977-2004) | OS         | medFU 21m  | All GIST patients in the SEER database 1977-2004.                                                                | Male OS HR 1.33 (95CI 1.15-1.54, p<0.001) on univariate analysis. For unclear reasons, not included on multivariate analyses. | Yes (U)        | F   |
| 2011                    | Calabuig et al., 2011, J of Int Surg Path          | 145  | M: 86, F: 59                   | Retrospective, monocentre cohort                | PFS, OS    | medFU 52m  | All GIST patients treated in one Spanish centre.                                                                 | No sex difference for PFS nor OS on univariate analysis and therefore not included in multivariate analysis.                  | No (U)         | N/A |
| 2012                    | Call et al., 2012, BMC                             | 1215 | M: 628, F: 586                 | Retrospective, patient reported cohort          | OS         | medFU 5.2y | Patients from 48 different countries, diagnosed and treated in all settings.                                     | Relatively more female in younger age groups. OS HR male 1.5 (p=0.0010, univariate)                                           | Yes (U)        | F   |
| 2013                    | Seker et al., 2013, Hep-Gastroen                   | 333  | M: 204, F: 129                 | Retrospective, multicentre cohort               | OS         | medFU 26m  | All GIST patients were included. Patients with complete surgical resection were compared to metastatic patients. | No sex difference for OS on univariate analysis.                                                                              | No (U)         | N/A |
| 2014                    | Chiang et al., 2014, BMC Cancer                    | 2986 | M: 1641, F: 1345               | Taiwan Cancer Registry                          | OS         | NS         | All GIST patients from the Taiwan Cancer Registry 1998-2008.                                                     | Female HR OS 0.68 (95%CI 0.60-0.77, p<0.001) on multivariable analysis.                                                       | Yes (M)        | F   |
| 2015                    | Rubio-Casadevall et al., 2015, World J Of Surg Onc | 132  | M: 67, F: 53                   | Retrospective, multicentre cohort               | OS         | medFU 97m  | All GIST patients from two cancer registries in Spain (1996-2006).                                               | No sex difference on multivariate analysis.                                                                                   | No (M)         | N/A |
| 2015                    | Kramer et al., 2015, BMC                           | 212  | M: 96, F: 116                  | Retrospective cohort, German Registry           | DSS and OS | medFU 4.3y | Patients <50yrs (n=87) compared to patients >50yrs (n=125).                                                      | In young cohort longer DSS for female patients (p=0.033), not in older cohort (p=0.596, both univariate)                      | <50yrs Yes (U) | F   |
| 2015                    | Kukar et al., 2015, J of Surg Oncol                | 4411 | M: 2804, F: 1607               | SEER 1990-2009                                  | DSS        | NS         | GIST in uncommon locations were investigated.                                                                    | Female HR DSS 0.80 (0.70-0.92, p=0.002) in entire cohort on multivariate analysis. Also in surgical                           | Yes (M)        | F   |

Supplementary Table 1: Overview of the literature on sex differences in GIST survival

|      |                                      |      |                  |                                                      |                        |              |                                                                                                                                                                   |                                                                                                             |         |     |
|------|--------------------------------------|------|------------------|------------------------------------------------------|------------------------|--------------|-------------------------------------------------------------------------------------------------------------------------------------------------------------------|-------------------------------------------------------------------------------------------------------------|---------|-----|
|      |                                      |      |                  |                                                      |                        |              |                                                                                                                                                                   | resection group a significant DSS benefit for females (HR 0.73).                                            |         |     |
| 2015 | Guller et al., 2015, BMC Cancer      | 5138 | M: 2709, F: 2429 | SEER database 1998-2011                              | DSS, OS                | medFU 37m    | All histologically confirmed GIST patients from 1998-2011 in the SEER database were included.                                                                     | Female HR DSS 0.77 (0.68-0.88, p<0.001) and HR OS 0.70 (0.63-0.78, p<0.001) on multivariable analyses.      | Yes (M) | F   |
| 2015 | Ma et al., 2015, Canc Epid Biom Prev | 6142 | M: 3263, F: 2879 | SEER 2001-2011                                       | DSS, OS                | NS           | All GIST patients in SEER database 2001-2011.                                                                                                                     | Male HR DSS 1.36 (1.20-1.55) and OS 1.41 (1.28-1.54) on multivariate analyses.                              | Yes (M) | F   |
| 2016 | Smith et al., 2016, Int J Cancer     | 1705 | M: 885, F: 820   | SEER 2001-2009                                       | OS                     | NS           | All GIST patients were included and risk factor for additional malignancies were identified.                                                                      | Female HR OS 0.68 (0.56-0.82, p<0.001) on multivariate analysis.                                            | Yes (M) | F   |
| 2017 | Fero et al., 2017, JAMA surgery      | 392  | M: 207, F: 185   | Retrospective cohort, SEER patients 2001-2013        | DSS                    | NS           | 392 adolescents and young adults (AYA) and 5373 older adults (OA) patients diagnosed with GISTs: 207 [52.8%] male AYA patients and 2767 [51.5%] male OA patients. | Male AYA patients HR DSS 1.78 (1.04-3.04, p=0.04, multivariate). No sex difference in frequency of surgery. | Yes (M) | F   |
| 2017 | Guller et al., 2017, Gastric Cancer  | 5096 | M: 2682, F: 2414 | SEER database 1998-2011 (overlap cohort Guller 2015) | DSS, OS                | medFU 37m    | All histologically confirmed GIST cases with available tumour site were included.                                                                                 | Female HR DSS 0.80 (0.70-0.90, p<0.001) and female HR OS 0.72 (0.65-0.80, p<0.001).                         | Yes (M) | F   |
| 2018 | Van der Graaf et al., 2018, BJS      | 1749 | M: 945, F: 804   | Retrospective, national cohort                       | relative survival (RS) | medFU 69.9m  | All GIST patients from the Netherlands (no micro-GIST).                                                                                                           | 5-y RS Male 74.9% (95%CI 65.6-76.0) vs. 81.3% (95% CI 77.3-85.1) for female patients.                       | Yes (U) | F   |
| 2018 | Li et al., 2018, JBUON               | 420  | M: 216, F: 204   | Retrospective monocentre cohort                      | OS                     | medFU 29-34m | 143 GIST patients with metastatic or recurrent GIST were compared to 278 patients without metastasis or recurrent disease.                                        | No sex difference for OS on univariate analysis and therefore not included on multivariate analysis.        | No (U)  | N/A |
| 2018 | Song et al., 2018, EJSO              | 5622 | M: 2951, F: 2671 | SEER database (2004-2015)                            | OS, CSS                | medFU 34m    | All GIST patients with available follow-up data from 2004-2015.                                                                                                   | Female HR OS 0.769 (95%CI 0.661-0.895, p=0.001). Sex difference for CSS significant but not specified.      | Yes (M) | F   |

Supplementary Table 1: Overview of the literature on sex differences in GIST survival

|      |                                                           |      |                  |                                                      |         |           |                                                                                                                                                                 |                                                                                                                                                                                                                                                                                       |         |     |
|------|-----------------------------------------------------------|------|------------------|------------------------------------------------------|---------|-----------|-----------------------------------------------------------------------------------------------------------------------------------------------------------------|---------------------------------------------------------------------------------------------------------------------------------------------------------------------------------------------------------------------------------------------------------------------------------------|---------|-----|
| 2018 | Gaitanidis et al., 2018, <i>Langenbeck's Arch of Surg</i> | 201  | NS in subgroup   | SEER database lymph node metastases (2004-2014)      | OS      | NS        | In total 1430 patients, subgroup for OS in 201 patients with synchronous distant metastasis.                                                                    | No difference on univariate analysis (therefore not included in multivariate).                                                                                                                                                                                                        | No (U)  | N/A |
| 2019 | Ulanja et al., 2019, <i>J of Rac and Ethc H Disp</i>      | 7204 | M: 3445, F: 3759 | SEER database 2002-2015                              | OS      | NS        | All GIST patients from the SEER database in the timeframe were included.                                                                                        | Male HR OS 1.48 (1.27-1.74, p<0.001) on multivariate analysis.                                                                                                                                                                                                                        | Yes (M) | F   |
| 2019 | Chen et al., 2019, <i>BioMed Res Int</i>                  | 6713 | M: 3522, F: 3191 | SEER Database (2004-2014)                            | OS, DSS | medFU 45m | All GIST patients were included and subdivided in a training set (n=4699) and validation set (n=2014) to develop a nomogram. Survival analysis in training set. | Male worse OS and DSS on multivariate analysis (HR DSS 1.269, 95%CI 1.1063-1.516, p=0.008)                                                                                                                                                                                            | Yes (M) | F   |
| 2020 | Calderillo et al., 2020, <i>JCO Global Oncol</i>          | 624  | M: 274, F: 350   | Retrospective, multicentre cohort (Chile and Mexico) | OS      | NS        | All GIST patients with at least 3 months follow-up and available data.                                                                                          | No sex difference for OS (Kaplan Meier method compared by log-rank test).                                                                                                                                                                                                             | No (U)  | N/A |
| 2020 | Rong et al., 2020, <i>Biol of Sex Diff</i>                | 1050 | M: 512, F: 538   | SEER database (2010-2016)                            | OS      | NS        | Characteristics of male and female gastric GIST patients (all stages) were compared.                                                                            | Male patients were more often married, underwent less often surgery, and had relatively larger tumours. Mitotic index appeared to be lower in female patients. After PSM a better OS for female patients. Male HR OS 1.677 (1.150-2.444, p=0.007) on multivariate analysis after PSM. | Yes (M) | F   |
| 2020 | Shen et al., 2020, <i>World J of Surg Oncol</i>           | 8511 | M: 4434, F: 4077 | SEER database (1988-2016)                            | DSS, OS | medFU 44m | Patients with GIST after another malignancy (n=851) were compared to patients with GIST as first malignancy (n=7660).                                           | More males in group with GIST after another malignancy (56.5%). Female HR DSS 0.76 (0.69-0.83, p<0.001) on multivariate analyses and female advantage for OS as well.                                                                                                                 | Yes (M) | F   |
| 2020 | Florindez et al., 2020, <i>Am J of Clin Onc</i>           | 3866 | M: 1981, F: 1885 | SEER database (2010-2015)                            | DSS, OS | NS        | All adult GIST patients from SEER database 2010-2015.                                                                                                           | Male worse OS on all three multivariate analyses: entire cohort, metastatic cohort (n=656) and localized cohort (n=3210). However, no sex difference for DSS.                                                                                                                         | No (M)  | N/A |

Supplementary Table 1: Overview of the literature on sex differences in GIST survival

|      |                                      |      |                   |                                                    |         |            |                                                                                                                                                                                                                                                                    |                                                                                                                                           |        |     |
|------|--------------------------------------|------|-------------------|----------------------------------------------------|---------|------------|--------------------------------------------------------------------------------------------------------------------------------------------------------------------------------------------------------------------------------------------------------------------|-------------------------------------------------------------------------------------------------------------------------------------------|--------|-----|
| 2021 | <b>Cavnar et al., 2021, Ann Surg</b> | 1000 | M: 532,<br>F: 468 | Retrospective monocentre cohort. MSKCC (1982-2016) | OS, RFS | medFU 4.6y | Patients who underwent surgery, stratified by presentation status: primary tumour only, primary with synchronous metastasis or metachronous recurrence/metastases. Patients treated in the pre-imatinib era were compared to patients treated in the imatinib era. | No sex differences in RFS and OS in pre-imatinib nor imatinib era (multivariate). Male seemed to be more often M1 at diagnosis (p=0.025). | No (M) | N/A |
|------|--------------------------------------|------|-------------------|----------------------------------------------------|---------|------------|--------------------------------------------------------------------------------------------------------------------------------------------------------------------------------------------------------------------------------------------------------------------|-------------------------------------------------------------------------------------------------------------------------------------------|--------|-----|

Pts. = patients, M = Male, F = female, FU = follow-up duration, medFU = median follow-up duration, mFU = mean follow-up duration, m = months, y = years OS = overall survival, DSS = disease specific survival, RFS = recurrence free survival, PFS = progression-free survival, CSS = cancer specific survival, NS = not specified, N/A = not applicable
